# Supplementary material for: Association between arsenic exposure and inflammatory cytokines and C-reaction protein: A systematic review and meta-analysis
Source: PubMed Central journal article supplement — Medicine (Baltimore). 2022 Dec 16;101(50):e32352. doi: 10.1097/MD.0000000000032352 (PMC9771207; doi:10.1097/md.0000000000032352), 2022-12-16
Supplement: medi-101-e32352-s001.pdf [file medi-101-e32352-s001.pdf]

PubMed search strategy

#1 arsenic OR Arsenicum OR Arsenium OR arsenic exposure

#2 Inflammation OR inflammatory OR cytokines OR chemokine

#3 IL-1 $\beta$  OR IL-2 OR IL-4 OR IL-5 OR IL-6 OR IL-8 OR IL-10 OR IL-12 OR "Tumor Necrosis Factor-alpha" OR TNF- $\alpha$  OR CRP OR "C-reactive protein" OR IFN- $\gamma$  OR "Interferons" OR interferon gamma

#4 #2 OR #3

#5 #1 AND #4

Time: 2000-01 to 2022-09

Results: 1419
